# Supplementary material for: Oral administration ofLactococcus lactisWHH2078 alleviates depressive and anxiety symptoms in mice with induced chronic stress
Source: Royal Society of Chemistry journal article supplement (doi:10.1039/d1fo03723d), 2021-12-23
Supplement: d1fo03723d1.pdf [file d1fo03723d1.pdf]

## Supplemental Information

### Oral administration of *Lactococcus lactis* WHH2078 alleviates depressive and anxiety symptoms in mice with induced chronic stress

Kan Gao<sup>a, b, c</sup>, Aitak Farzi<sup>d</sup>, Xueqin Ke<sup>a, b</sup>, Yunxia Yu<sup>a, b</sup>, Cailin Chen<sup>a, b</sup>, Su Chen<sup>a, b</sup>, Tengfei Yu<sup>a, b</sup>,  
Haifeng Wang<sup>c, \*</sup>, Yanjun Li<sup>a, b, e, \*</sup>

<sup>a</sup> *Key Laboratory of Food And Biological Engineering of Zhejiang Province, Hangzhou 310018, P.R. China*

<sup>b</sup> *Research and Development Department, Hangzhou Wahaha Group Co., Ltd, Hangzhou 310018, P.R. China*

<sup>c</sup> *College of Animal Science, MOE Key Laboratory of Molecular Animal Nutrition, Zhejiang University, Hangzhou 310058, P.R. China*

<sup>d</sup> *Division of Pharmacology, Otto Loewi Research Center (for Vascular Biology, Immunology and Inflammation), Medical University of Graz, 8010 Graz, Austria*

<sup>e</sup> *College of Biosystems Engineering and Food Science, Zhejiang University, Hangzhou 310058, P.R. China*

First Author:

Kan Gao, Ph.D

Email Address: kevingogh911@hotmail.com

\*Corresponding Author:

Haifeng Wang, Ph.D., Professor

Email Address: haifengwang@zju.edu.cn

Yanjun Li, Ph.D., Professor

Email Address: lyj@wahaha.com.cn

## **SUPPLEMENTARY METHODS**

### **Chronic stress-induced depressive model**

In this study, the chronic unpredictable mild stress (CUMS) model was used, which is a classical model for inducing depression in rodents and is validated by various preclinical studies<sup>1-4</sup>. The CUMS stressors used in this study are mild and have no fatal risk.

#### **1. Tube restraint**

The mouse was placed gently in a 50 mL plastic tube with multiple holes at the far end to allow breathing, Bedding was added into the plastic tube to make the mouse unable to move, then the plastic tube was covered slightly. The mouse returned to its cage after 6 h of restraint.

#### **2. Food deprivation**

The food was removed from the mouse cage for 24 h.

#### **3. Water deprivation**

The bottle of water was removed from the mouse cage for 24 h.

#### **4. Wet bedding**

A hundred mL of sterile water was added to the bedding in the mouse cage and replaced with new dry bedding after 24 h.

#### **5. No bedding**

The bedding in the mouse cage was removed for 24 h.

#### **6. 45° cage tilt**

The mouse cage was tilted at 45° for 24 h.

#### **7. Clip tail**

The mouse tail was clamped by a paper clip at 2-3 cm from the tail tip for 1 min each time, 5 times per day.

#### **8. Continuous illumination**

The mouse cage was moved into an environment with continuous white light for 24 h. The illumination intensity is 500 lux.

#### **9. Swimming in cold water**

A glass tank (50 cm × 50 cm × 50 cm) with 30 cm deep water (12°C) was prepared. The mouse was placed into the glass tank for 5 min; after swimming, the mouse was returned to the cage with dry bedding immediately.

## **Behavioral tests**

### **1. Sucrose preference test (SPT)**

Sucrose preference test was performed following the procedures described previously with minor modification <sup>5</sup>. Briefly, before testing, mice were habituated in a cage with 1% sucrose and water bottles randomly assigned for 24 h. After the adaptation, mice were fasted for 24 h, then were separated in a single per cage with two drinking bottles for 24 h: one containing 1% sucrose and another containing sterile water. Each bottle was weighed before and after the test. The sucrose preference ratio (SPR) was calculated as follows:  $SPR (\%) = \text{sucrose intake} / \text{total fluid intake (including sucrose and water intake)} \times 100\%$

### **2. Tail suspension test (TST)**

Tail suspension test was conducted according to a previous method <sup>6</sup>. Briefly, the mouse tail was taped with adhesive tape to a suspension bar, which is 50 cm high from the floor. Locomotor activity is monitored by the video tracking system (JLBehv-STGM-1, Yuyan instruments Co. Ltd., Shanghai, China) for 5 min <sup>7-9</sup>. The immobility time was scored. Immobility is defined as the absence of voluntary or escape-orientated movement.

### **3. Forced swim test (FST)**

Forced swim test was performed according to a previous method <sup>10</sup>. Briefly, a glass cylinder filled with 30 cm deep water at  $25 \pm 2$  °C was prepared. One day before testing, mice were placed into the glass cylinder to train swimming for 15 min. On the testing day, mice were placed into the same glass cylinder to swim for 5 min <sup>7-9</sup>. Locomotor activity is monitored using a video tracking system (JLBehv-FSM-1, Yuyan instruments Co. Ltd., Shanghai, China), which calculates the immobility time of each mouse during the test period. Immobility is defined as the motionless situation except floating motions required to keep the head above the water <sup>3</sup>.

### **4. Open field test (OFT)**

Open field test was carried out following the procedures described previously <sup>11</sup>. Briefly, a cube with a square arena (50 cm × 50 cm × 50 cm) enclosed by continuous black walls made of plexiglass was prepared. Mice were placed into the middle of the area facing the wall, and locomotor activity was monitored using a video tracking system (JLBehv-LAM-1, Yuyan instruments Co. Ltd., Shanghai, China) for 5 minutes. The time spent in the central area (25 cm × 25 cm) and the distance traveled were measured.

**SUPPLEMENTARY TABLES**

**Table S1.** The basic information of candidate *Lactococcus lactis* strains

| <b>Strains</b> | <b>Species</b>                                      | <b>Origin</b> | <b>Collection Location</b>          | <b>Isolation Time</b> | <b>Storage Condition</b> |
|----------------|-----------------------------------------------------|---------------|-------------------------------------|-----------------------|--------------------------|
| WHH695         | <i>Lactococcus lactis</i><br><i>subsp. cremoris</i> | Yogurt        | Xining, Qinghai,<br>China           | June<br>2013          | -80°C in<br>glycerol     |
| WHH822         | <i>Lactococcus lactis</i><br><i>subsp. lactis</i>   | Yogurt        | Bayannaer, Inner<br>Mongolia, China | June<br>2014          | -80°C in<br>glycerol     |
| WHH826         | <i>Lactococcus lactis</i><br><i>subsp. lactis</i>   | Yogurt        | Xining, Qinghai,<br>China           | October<br>2014       | -80°C in<br>glycerol     |
| WHH853         | <i>Lactococcus lactis</i><br><i>subsp. cremoris</i> | Yogurt        | Bayannaer, Inner<br>Mongolia, China | June<br>2015          | -80°C in<br>glycerol     |
| WHH879         | <i>Lactococcus lactis</i><br><i>subsp. lactis</i>   | Cheese        | Linhe, Inner<br>Mongolia, China     | June<br>2015          | -80°C in<br>glycerol     |
| WHH888         | <i>Lactococcus lactis</i><br><i>subsp. lactis</i>   | Yogurt        | Bayannaer, Inner<br>Mongolia, China | October<br>2015       | -80°C in<br>glycerol     |
| WHH889         | <i>Lactococcus lactis</i><br><i>subsp. cremoris</i> | Cheese        | Bayannaer, Inner<br>Mongolia, China | October<br>2015       | -80°C in<br>glycerol     |
| WHH893         | <i>Lactococcus lactis</i><br><i>subsp. lactis</i>   | Yogurt        | Bayannaer, Inner<br>Mongolia, China | October<br>2015       | -80°C in<br>glycerol     |
| WHH912         | <i>Lactococcus lactis</i><br><i>subsp. lactis</i>   | Yogurt        | Linhe, Inner<br>Mongolia, China     | June<br>2016          | -80°C in<br>glycerol     |
| WHH924         | <i>Lactococcus lactis</i><br><i>subsp. lactis</i>   | Yogurt        | Linhe, Inner<br>Mongolia, China     | June<br>2016          | -80°C in<br>glycerol     |
| WHH925         | <i>Lactococcus lactis</i><br><i>subsp. lactis</i>   | Cheese        | Bayannaer, Inner<br>Mongolia, China | June<br>2017          | -80°C in<br>glycerol     |
| WHH932         | <i>Lactococcus lactis</i><br><i>subsp. lactis</i>   | Yogurt        | Bayannaer, Inner<br>Mongolia, China | June<br>2017          | -80°C in<br>glycerol     |
| WHH1034        | <i>Lactococcus lactis</i><br><i>subsp. cremoris</i> | Cheese        | Linhe, Inner<br>Mongolia, China     | October<br>2017       | -80°C in<br>glycerol     |
| WHH2078        | <i>Lactococcus lactis</i><br><i>subsp. lactis</i>   | Yogurt        | Shigatse, Tibet,<br>China           | June<br>2018          | -80°C in<br>glycerol     |
| WHH2080        | <i>Lactococcus lactis</i><br><i>subsp. lactis</i>   | Cheese        | Shigatse, Tibet,<br>China           | June<br>2018          | -80°C in<br>glycerol     |
| WHH3683        | <i>Lactococcus lactis</i><br><i>subsp. cremoris</i> | Yogurt        | Yili, Xinjiang,<br>China            | October<br>2018       | -80°C in<br>glycerol     |
| WHH3684        | <i>Lactococcus lactis</i><br><i>subsp. lactis</i>   | Yogurt        | Yili, Xinjiang,<br>China            | October<br>2018       | -80°C in<br>glycerol     |
| WHH3823        | <i>Lactococcus lactis</i><br><i>subsp. cremoris</i> | Yogurt        | Yili, Xinjiang,<br>China            | October<br>2018       | -80°C in<br>glycerol     |
| WHH3831        | <i>Lactococcus lactis</i><br><i>subsp. lactis</i>   | Yogurt        | Yili, Xinjiang,<br>China            | October<br>2018       | -80°C in<br>glycerol     |

**Table S2.** The sensitivity, precision, and accuracy of the HPLC and ELISA methods used for neurochemical factors detection.

| Items                         | Sensitivity <sup>1</sup> | Precision (%) <sup>2</sup> | Accuracy (%) <sup>3</sup> |
|-------------------------------|--------------------------|----------------------------|---------------------------|
| <b>HPLC</b>                   |                          |                            |                           |
| RIN14B cell supernatant 5-HTP | 50.61                    | 1.71                       | 4.88                      |
| Hippocampal 5-HTP             | 43.20                    | 2.97                       | 6.29                      |
| Serum 5-HTP                   | 39.62                    | 1.43                       | 5.19                      |
| Colonic 5-HTP                 | 64.21                    | 4.17                       | 6.24                      |
| <b>ELISA</b>                  |                          |                            |                           |
| Hippocampal 5-HT              | 44.30                    | 2.88                       | 5.22                      |
| Hippocampus mBDNF             | 50.62                    | 3.15                       | 4.50                      |
| Serum corticosterone          | 82.27                    | 3.24                       | 5.51                      |

<sup>1</sup> Neurochemical factors standards in the range of 1 pg/mL to 10 µg/mL and the assays are linear between 100 pg/mL and 1 µg/mL for 5-HTP ( $r^2 = 0.9996$ ), 5-HT ( $r^2 = 0.9992$ ), mBDNF ( $r^2 = 0.9991$ ), and corticosterone ( $r^2 = 0.9996$ ). The sensitivity of the method is indicated by the slope of the neurochemical factor standard curve.

<sup>2</sup> The precision (agreement between replicate measurements) of the method, as evaluated by the relative deviation (mean of absolute deviation/mean of replicate measurements  $\times 100\%$ ). A value below 5 % indicates the method is highly precise.

<sup>3</sup> The accuracy (the closeness of an experimental value to the true value) of the method, as determined with known amounts of neurochemical factors standards and expressed as the relative errors [(measurement value – true value)/true value  $\times 100\%$ ]. A value below 10 % indicates the method is highly accurate.

## References

1. Y. Qiao, J. Zhao, C. Li, M. Zhang, L. Wei, X. Zhang, O. Kurskaya, H. Bi and T. Gao, Effect of combined chronic predictable and unpredictable stress on depression-like symptoms in mice, *Ann Transl Med*, 2020, **8**, 942.
2. S. Antoniuk, M. Bijata, E. Ponimaskin and J. Wlodarczyk, Chronic unpredictable mild stress for modeling depression in rodents: Meta-analysis of model reliability, *Neurosci Biobehav Rev*, 2019, **99**, 101-116.
3. P. Tian, R. Zou, L. Song, X. Zhang, B. Jiang, G. Wang, Y. K. Lee, J. Zhao, H. Zhang and W. Chen, Ingestion of *Bifidobacterium longum* subspecies *infantis* strain CCFM687 regulated emotional behavior and the central BDNF pathway in chronic stress-induced depressive mice through reshaping the gut microbiota, *Food Funct*, 2019, **10**, 7588-7598.
4. H. Li, P. Wang, L. Huang, P. Li and D. Zhang, Effects of regulating gut microbiota on the serotonin metabolism in the chronic unpredictable mild stress rat model, *Neurogastroenterol Motil*, 2019, **31**, e13677.
5. H. Dang, Y. Chen, X. Liu, Q. Wang, L. Wang, W. Jia and Y. Wang, Antidepressant effects of ginseng total saponins in the forced swimming test and chronic mild stress models of depression, *Prog Neuropsychopharmacol Biol Psychiatry*, 2009, **33**, 1417-1424.
6. L. Steru, R. Chermat, B. Thierry and P. Simon, The tail suspension test: a new method for screening antidepressants in mice, *Psychopharmacology (Berl)*, 1985, **85**, 367-370.
7. M. Chatterjee, M. Jaiswal and G. Palit, Comparative evaluation of forced swim test and tail suspension test as models of negative symptom of Schizophrenia in rodents, *ISRN Psychiatry*, 2012, **2012**, 595141.
8. A. Nandi, G. Virmani, A. Barve and S. Marathe, DBscorer: An open-source software for automated accurate analysis of rodent behavior in forced swim test and tail suspension test, *eNeuro*, 2021, **8**.
9. X. Zhao, F. Cao, Q. Liu, X. Li, G. Xu, G. Liu, Y. Zhang, X. Yang, S. Yi, F. Xu, K. Fan and J. Ma, Behavioral, inflammatory and neurochemical disturbances in LPS and UCMS-induced mouse models of depression, *Behav Brain Res*, 2019, **364**, 494-502.
10. R. D. Porsolt, A. Bertin and M. Jalfre, Behavioral despair in mice: a primary screening test for antidepressants, *Arch Int Pharmacodyn Ther*, 1977, **229**, 327-336.
11. E. Choleris, A. W. Thomas, M. Kavaliers and F. S. Prato, A detailed ethological analysis of the mouse open field test: effects of diazepam, chlordiazepoxide and an extremely low frequency pulsed magnetic field, *Neurosci Biobehav Rev*, 2001, **25**, 235-260.
